# Supplementary material
Source: publisher figshare collection journal article supplement (https://frontiersin.figshare.com/ndownloader/files/27992412)
Supplement: Supplementary file [file 27992412]

**A**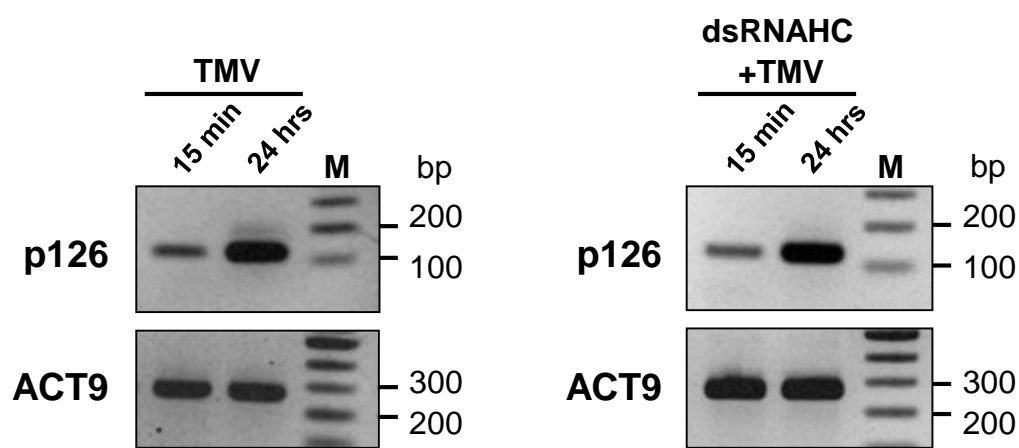**B**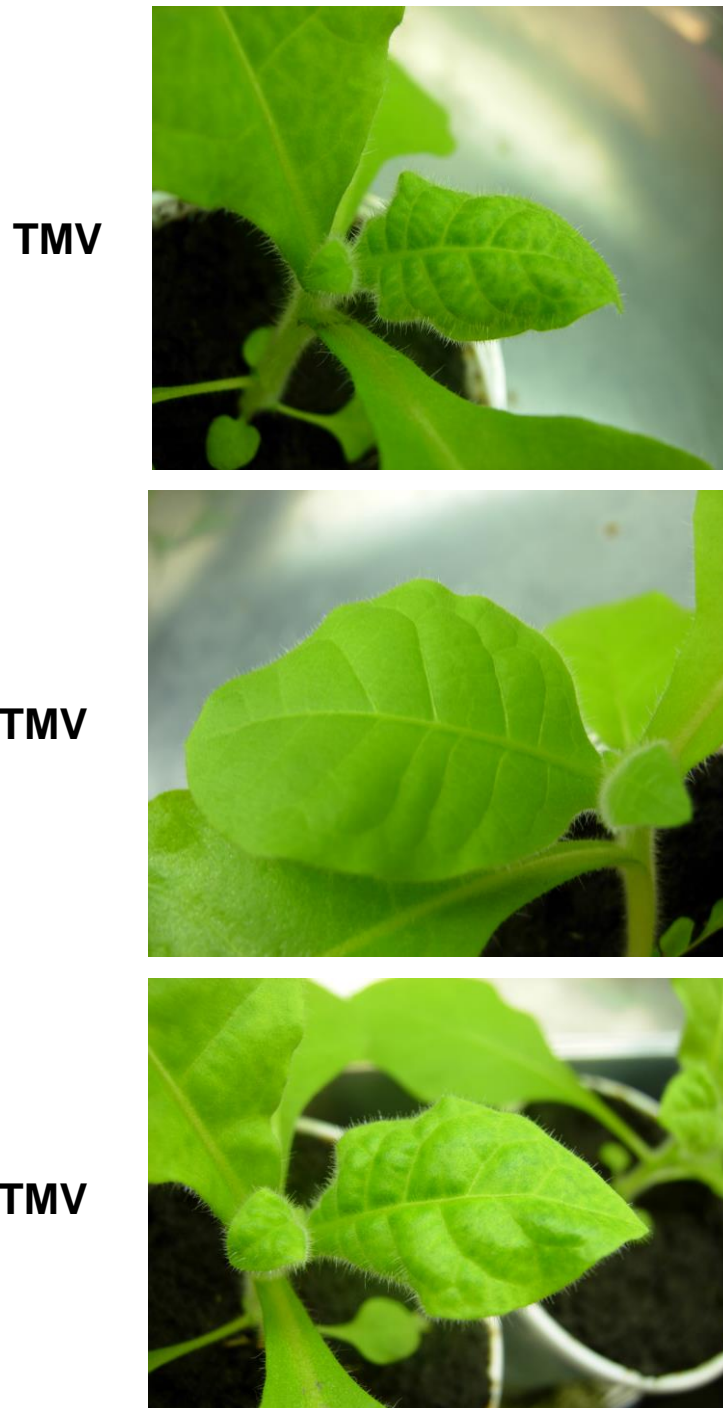

**FIGURE S4 |** Non-protective effect of non-homologous dsRNAHC (deriving from HC-Pro of *Zucchini yellow mosaic virus*) against TMV in tobacco. **(A)** Gel showing p126 RNA abundance by semi-quantitative RT-PCR. RNA samples from tobacco treated with TMV (left panels) and dsRNAHC+TMV (right panels) were collected at two time points (15 min and 24 hrs post treatment). Nt-ACT9 was employed as an endogenous reference gene. M is a low-molecular-weight DNA marker (New England Biolabs, USA). **(B)** Tobacco response to TMV (mosaic symptoms), dsRNAp126+TMV (no symptoms), and dsRNAHC+TMV (mosaic symptoms). Photographs were taken six days post treatment.
